# Supplementary material
Source: Elsevier journal article supplement (https://www.sciencedirect.com/science/article/pii/S1579212920301695)
Supplement: mmc1 [file S1579212920301695:mmc1.pdf]

**PREVALENCIA DE DEFICIT DE ALFA 1 ANTIRIPSINA EN PACIENTES CON EPOC EN ARGENTINA. ESTUDIO DAAT.AR**

**ANEXO DE MATERIAL SUPLEMENTARIO ADICIONAL**

**Tabla de Contenido**

CENTROS PARTICIPANTES .....1

METODOS DE LABORATORIO.....2

Cuantificación de AAT en DBS por inmunonefelometría.....2

Genotipificación rápida.....2

Secuenciación.....4

ANALISIS ESTADISTICO.....7

Cálculo de la prevalencia.....7

**CENTROS PARTICIPANTES**

Estudio multicéntrico realizado en 3 centros de referencia para enfermedades respiratorias de la Ciudad y Provincia de Buenos Aires que además participaron del estudio EPOC.AR. El estudio incluyó pacientes consecutivos de consulta espontánea,  $\geq 30$  años de edad, de ambos sexos con diagnóstico por espirometría de EPOC y cuantificación de AAT.

**Tabla 1 del material suplementario adicional: Listado de centros participantes.**

| Centros                                                                                                       | Pacientes Incluidos |
|---------------------------------------------------------------------------------------------------------------|---------------------|
| Hospital Especializado de Agudos y Crónicos “Dr. A. Cetrángolo”, Vicente López, Argentina                     | 1697                |
| Hospital Municipal de Rehabilitación Respiratoria “María Ferrer”, Ciudad Autónoma de Buenos Aires, Argentina. | 895                 |
| Hospital Interzonal Especializado de Agudos y Crónicos “San Juan de Dios”, La Plata, Argentina                | 662                 |

## **METODOS DE LABORATORIO**

### **Cuantificación de AAT en DBS por inmunonefelometría**

La totalidad de las muestras de sangre de todos los centros participantes fueron aplicadas a 5 discos de papel (DBS, número 903; Schiecher & Schuell; Bioscience Inc., Keene, NH, EE. UU.). Se dejaron secar a temperatura ambiente antes de ser enviadas al laboratorio central del Hospital Italiano de Buenos Aires, donde se realizaron todas las determinaciones de laboratorio.

Las muestras fueron diluidas durante una noche a 4°C con 300 uL de agua destilada a partir un disco de papel de DBS de 6 mm. Los tubos fueron centrifugados durante 10 min a 3200 rpm. La cuantificación de AAT en DBS se efectuó por inmunonefelometría (Image®, Beckman Coulter, Inc., CA, EE. UU.). Se realizó una curva de regresión, con la que fue posible estimar la concentración de AAT en suero a partir de la concentración en DBS. Se utilizó un punto de corte de 1,5 mg/dL que corresponde a 80 mg/dL de AAT sérica. El rango de detección del ensayo nefelometrico en DBS es de 0.281 -2.81 mg/dL correspondiente a 8-173 mg/dL en suero de acuerdo a la curva de regresión.

### **Genotipificación rápida**

Se realizó genotipificación rápida en aquellos pacientes que presentaban una concentración de AAT menor al punto de corte elegido. El método utilizado para realizar la genotipificación rápida fue una reacción en cadena de la polimerasa en tiempo real ("PCR real time", LightCycler® DNA analyzer, Roche Diagnostics, Mannheim, Alemania) con cebadores para amplificación de 2 fragmentos de 177 pb y 229 pb. Se utilizaron sondas de hibridación específicas para la detección de la mutación S (E264V) y Z (E342K), respectivamente. Se clasificaron los pacientes según la combinación de alelos codominantes S y Z, y se consideraron como genotipo asociado a déficit severo (DAAT) las variantes SZ y ZZ.

Para la extracción del material genético a partir de DBS, se procedió a obtener 2 discos de 6 mm de sangre seca a partir de la muestra recibida. Se colocaron en un eppendorf de 1,5 ml y se le agrego 1700 ul de buffer lisis bajo flujo laminar. Luego se agitó en agitador horizontal durante 1 hora. Se extrajo el material genético eluido en el buffer lisis a partir de las muestras utilizando el equipo Nuclisense Easy Mag (Biomerieux).

La genotipificación de la AAT se realizó con el analizador LightCycler (Roche Diagnostic, Alemania), una combinación de termociclador y fluorímetro que permite una rápida amplificación de ADN mediante la técnica de reacción en cadena de la polimerasa (PCR) y la detección de los genotipos.

El ensayo cualitativo es una PCR en capilares de vidrio usando el Light Cycler como instrumento y las sondas de hibridación para la detección por Real Time PCR, de un fragmento de 238 pares de bases para el alelo Pi\*S (E264V) y otro de 136 pares de bases para el alelo Pi\*Z (E342K). Estos fragmentos son amplificados con cebadores específicos y los amplicones son detectado por fluorescencia a través de un par de sondas específicas. La sonda de hibridación para el alelo Pi\*S y para el alelo Pi\*Z con sondas SimpleProbe que se detectan a 640 nm. El genotipo es identificado por un análisis de curva de melting en la que el wildtype exhibe un Tm de 57 °C y 63 °C en el canal 640, mientras que la variante Pi\*S posee un Tm de 49°C y Pi\*Z a 57°C en el canal 640. Al realizar las reacciones en capilares separados es posible usar el mismo canal de detección para los alelos S y Z, pero realizar la corrida en paralelo con el mismo programa de ciclado.

La secuencia de los cebadores utilizados fue la siguiente:

Para alelo S:

PiSF 5'-GGTGCCTATGATGAAGCGTTTAGGC-3'

PiSR 5'-AGGTGTGGGCAGCTTCTTGGTCA-3'

Para alelo Z:

PiZF 5'-GGTGTCCACGTGAGCC TTGC-3'

PiZR 5'-AAAAACATGGCCCCAGCAGCT-3'.

Las sondas utilizadas fueron:

Para alelo S:

5'-GCACCTGGAAAATGAAC-3' marcada en su extremo 5' con fluoroforo LightCycler red LCR 640 (diseñada para hibridar en la posición de la mutación)

5'-TTCTTCCTGCCTGATGAGGGGAACTA-3' marcada con fluoresceína en el extremo 3'.

Para alelo Z

5'-GACCATCGACGAGAAAGGG-3', marcada en el extremo 5' con fluorocromo LC640 (diseñada para hibridar en la posición de la mutación)

5'-CTCCAGGCCGTGCATAAGGCTGT-3' marcada con fluoresceína en el extremo 3'.

### **Secuenciación**

Cuando existía una discordancia entre la concentración de la proteína correspondiente a déficit y el genotipo, se realizó fenotipificación en suero por isoelectroenfoque (IEF-Hydrasys®, Sebia, París, Francia). En aquellos pacientes con discordancia entre el genotipo y el fenotipo se realizó secuenciación del ADN genómico obtenido de muestras de sangre entera. La amplificación de los exones 2-5 de AAT se realizó mediante PCR con pares de cebadores específicos. Los productos de PCR purificados se secuenciaron utilizando el Analizador Genético ABI 3500 (Thermo Fisher Scientific).

La extracción de ADN de las muestras de pacientes se llevó a cabo a partir de sangre entera con EDTA utilizando como método de extracción el kit Blood Minikit Qiagen.

La amplificación de los exones 2-5 de AAT se realizó mediante PCR con pares de cebadores específicos.

Exón 2 (880pb)

2F: 5' ACGTGGTGTCAATCCCTGATCACTG 3'

2R: 5' GAGTTCAAGAACTGATGGTTTGAG 3'

Exón 3 (550pb)

3F: 5' GCTACACTCTTCCAAACCT 3'

3R: 5' GTTCTCCTCATGGAGCAT 3'

Exón 4 (257pb)

4F: 5' CACTTGCACTGTGGTGGGTCCCAG 3'

4R: 5' TTCTTCCCTACAGATACCATGG 3'

Exón 5 (339pb)

5F: 5' CCTGGGATCAGCCTTACAAC 3'

5R: 5' CAGAGAAAACATGGGAGGGATTACA 3'

El programa de ciclado se detalla a continuación y se realizó utilizando termocicladores Veriti® Thermal Cycler (Applied Biosystems®)

# Programa de ciclado:

|       |        |        |
|-------|--------|--------|
| 1X    | 95°C   | 5 MIN  |
| 5X    | 95 °C  | 30 SEG |
| 64 °C | 30 SEG |        |
| 68 °C | 1 MIN  |        |
| 10X   | 95 °C  | 30 SEG |
| 59 °C | 30 SEG |        |
| 68 °C | 1 MIN  |        |
| 20X   | 95 °C  | 30 SEG |
| 54 °C | 30 SEG |        |
| 68 °C | 1 MIN  |        |
| 1X    | 68 °C  | 7 MIN  |
| 4 °C  | ∞      |        |

La purificación de los amplicones se llevó a cabo mediante la utilización del kit ExoProStar Enzymatic PCR and Sequencing clean-up. Se realizó un gel de agarosa al 2% para la visualización de los productos de PCR y la estimación de la concentración para cada exon. Los productos de PCR purificados se secuenciaron utilizando el Analizador Genético ABI 3500 (Thermo Fisher Scientific).

## ANALISIS ESTADISTICO

### Cálculo de la prevalencia

A continuación explicamos en detalle el procedimiento utilizado para los cálculos de prevalencia.

El cálculo de prevalencia del estudio DAAT.AR se basa en número de casos observados / número total de pacientes con EPOC incluidos en el estudio. Dado que la prevalencia es una proporción obtenida a través de un estudio de corte transversal (población cerrada) se estimó el intervalo de confianza del 95% a través del método exacto de Clopper-Pearson basado en la distribución binomial y calculado por el paquete estadístico “Binomial” del software R versión 3.5.0.

Una de las mayores críticas a los estudios de prevalencia de DAAT es que tienen un sesgo importante de selección de casos debido a que las características de los sujetos seleccionados son más representativas de los centros en donde se realizan los estudios que de la población general a donde se quieren extrapolar los hallazgos. Es por este motivo que utilizamos el método de ajuste directo de tasas a los efectos de poder estandarizar la cifra de prevalencia hallada en nuestro estudio.

La estandarización o ajuste se realizó en función de la distribución de edad, sexo y grado de severidad obstructiva (clasificación GOLD 2017) observada en una muestra probabilística representativa de los adultos con EPOC en Argentina obtenida del estudio EPOC AR (ver tabla 1 del material suplementario adicional).

**Tabla 2 del material suplementario adicional: Población de pacientes con EPOC (n: 502) del estudio EPOC.AR utilizada como población estándar para estimar la prevalencia ajustada por edad, sexo y severidad obstructiva.**

| Sexo y Edad | GOLD en los n 502 con EPOC |         |         |         |           |
|-------------|----------------------------|---------|---------|---------|-----------|
|             | 1 (No.)                    | 2 (No.) | 3 (No.) | 4 (No.) | No. Total |

|                |                 |    |    |    |   |            |
|----------------|-----------------|----|----|----|---|------------|
| <b>Hombres</b> | <b>MENOS 50</b> | 8  | 4  | 1  | 0 | 13         |
|                | <b>50-59</b>    | 18 | 39 | 4  | 1 | 62         |
|                | <b>60-69</b>    | 39 | 42 | 11 | 1 | 93         |
|                | <b>70-79</b>    | 34 | 36 | 6  | 1 | 77         |
|                | <b>80 y +</b>   | 13 | 7  | 1  | 0 | 21         |
|                |                 |    |    |    |   | <b>266</b> |
| <b>MUJERES</b> | <b>MENOS 50</b> | 4  | 10 | 1  | 0 | 15         |
|                | <b>50-59</b>    | 13 | 33 | 7  | 0 | 53         |
|                | <b>60-69</b>    | 33 | 38 | 4  | 1 | 76         |
|                | <b>70-79</b>    | 19 | 38 | 10 | 0 | 67         |
|                | <b>80 Y +</b>   | 10 | 12 | 3  | 0 | 25         |
|                |                 |    |    |    |   | <b>236</b> |
| <b>TOTAL</b>   |                 |    |    |    |   | <b>502</b> |

La estandarización (o ajuste) de tasa es un método epidemiológico clásico que remueve el efecto confusor de variables que difieren entre la población del estudio (en este caso pacientes con EPOC del estudio DAAT.AR) y la población general (pacientes con EPOC del estudio EPOC.AR) y se sabe (o se supone) que estas variables puedan influir en la prevalencia de la enfermedad.

Para realizar el ajuste directo utilizamos la estructura de la población de los pacientes con EPOC del estudio EPOC.AR en los cuales teníamos los datos de edad, sexo y grado de severidad obstructiva (tabla 1 del material suplementario adicional). En función de estas tres variables se forman “i” diferentes estratos, conteniendo cada uno una “wi” cantidad de sujetos. A estos “i” estratos de la población estándar se le aplica la tasa específica observada en cada estrato equivalente del estudio DAAT.AR.

La tasa específica observada de cada estrato del estudio DAAT.AR se obtiene de dividir el número de casos observado con déficit severo de ese estrato sobre el número total de sujetos en el estrato. De esta forma se obtiene el número de casos esperados en cada estrato de la población estándar. La tasa ajustada o estandarizada de prevalencia se obtiene dividiendo el total de casos esperados en la población estándar por el total de la población estándar ( $\sum w_i$ ).

Excluimos de este análisis a los 52 pacientes menores de 40 años de nuestra cohorte para que la misma sea absolutamente comparable con la población del EPOC.AR que incluyó pacientes a partir de dicha edad. Por ende luego del ajuste directo obtuvimos la prevalencia de DAAT en los pacientes con EPOC ( $\geq 40$  años) del estudio EPOC.AR de la Argentina. El intervalo de confianza fue calculado de igual forma que los anteriores (método exacto de Clopper-Pearson).
